# Supplementary material for: The Relationship Between Body Mass Index and In-hospital Survival in Patients Admitted With Acute Heart Failure
Source: PubMed Central journal article supplement (PMC9097269; doi:10.3389/fcvm.2022.855525), 2022-04-28
Supplement: Table_1.pdf [file Table_1.pdf]

**Appendix Table 1:**

| <b>ICD-10 CM codes</b>                                                                                                                                                        | <b>Condition</b>                               | <b>Score</b> |
|-------------------------------------------------------------------------------------------------------------------------------------------------------------------------------|------------------------------------------------|--------------|
| I21.x, I22.x, I25.2                                                                                                                                                           | Myocardial infarction                          | 1            |
| I09.9, I11.0, I13.0, I13.2, I25.5, I42.0, I42.5-I42.9, I43.x, I50.x, P29.0                                                                                                    | Congestive heart failure                       | 1            |
| I70.x, I71.x, I73.1, I73.8, I73.9, I77.1, I79.0, I79.2, K55.1, K55.8, K55.9, Z95.8, Z95.9                                                                                     | Peripheral vascular disease                    | 1            |
| G45.x, G46.x, H34.0, I60.x-I69.x                                                                                                                                              | Cerebrovascular disease                        | 1            |
| F00.x-F03.x, F05.1, G30.x, G31.1                                                                                                                                              | Dementia                                       | 1            |
| I27.8, I27.9, J40.x-J47.x, J60.x-J67.x, J68.4, J70.1, J70.3                                                                                                                   | Chronic pulmonary disease                      | 1            |
| M05.x, M06.x, M31.5, M32.x-M34.x, M35.1, M35.3, M36.0                                                                                                                         | Rheumatologic disease                          | 1            |
| K25.x-K28.x                                                                                                                                                                   | Peptic ulcer disease                           | 1            |
| B18.x, K70.0-K70.3, K70.9, K71.3-K71.5, K71.7, K73.x, K74.x, K76.0, K76.2-K76.4, K76.8, K76.9, Z94.4                                                                          | Mild liver disease                             | 1            |
| E10.0, E10.1, E10.6, E10.8, E10.9, E11.0, E11.1, E11.6, E11.8, E11.9, E12.0, E12.1, E12.6, E12.8, E12.9, E13.0, E13.1, E13.6, E13.8, E13.9, E14.0, E14.1, E14.6, E14.8, E14.9 | Diabetes                                       | 1            |
| E10.2-E10.5, E10.7, E11.2-E11.5, E11.7, E12.2-E12.5, E12.7, E13.2-E13.5, E13.7, E14.2-E14.5, E14.7                                                                            | Diabetes with chronic complications            | 2            |
| G04.1, G11.4, G80.1, G80.2, G81.x, G82.x, G83.0-G83.4, G83.9                                                                                                                  | Hemiplegia or paraplegia                       | 2            |
| I12.0, I13.1, N03.2-N03.7, N05.2-N05.7, N18.x, N19.x, N25.0, Z49.0-Z49.2, Z94.0, Z99.2                                                                                        | Renal disease                                  | 2            |
| C00.x-C26.x, C30.x-C34.x, C37.x-C41.x, C43.x, C45.x-C58.x, C60.x-C76.x, C81.x-C85.x, C88.x, C90.x-C97.x                                                                       | Any malignancy including leukemia and lymphoma | 2            |
| I85.0, I85.9, I86.4, I98.2, K70.4, K71.1, K72.1, K72.9, K76.5, K76.6, K76.7                                                                                                   | Moderate or severe liver disease               | 3            |
| C77.x-C80.x                                                                                                                                                                   | Metastatic solid tumor                         | 6            |
| B20.x-B22.x, B24.x                                                                                                                                                            | Acquired Immunodeficiency syndrome (AIDS)      | 6            |
